# Supplementary material
Source: MDPI journal article supplement (https://www.mdpi.com/2226-471X/4/2/42)
Supplement: s1 [file s1]

Archive with 2 entries (2 files):
- Appendices.pdf
- Raw data.xlsx
