# Supplementary material
Source: MDPI journal article supplement (https://www.mdpi.com/2226-471X/4/2/42)
Supplement: s1 [file s1 › Raw data.xlsx]

## Sheet: Student responses
Raw data (Spanish) - From hispanisms to anglicisms / Carlos I. Echeverría and César A. González Fernández
Participante	Respecto del uso de gerundios, entendidos estos como las formas verbales impersonales que en español terminan en “-ndo” (p. ej., “jugando”, “bailando”), ¿cuál de las siguientes alternativas refleja su experiencia como estudiante de traducción?	Definiéndose como anglicismo cualquier uso lingüístico proveniente del inglés o que imite los usos propios de dicha lengua, ¿estaría de acuerdo en calificar los gerundios como anglicismos?	Personalmente, ¿considera aceptable, en general, usar gerundios al escribir en español y al traducir del inglés al español?	Respecto del uso de adjetivos antepuestos al sustantivo (p. ej., “hermoso día”, “altos edificios”), ¿cuál de las siguientes alternativas refleja su experiencia como estudiante de traducción?	Angl	Accept	Respecto del uso de adverbios con la terminación “-mente” (p. ej., “rápidamente”, “efectivamente”), ¿cuál de las siguientes alternativas refleja su experiencia como estudiante de traducción?	Definiéndose como anglicismo cualquier uso lingüístico proveniente del inglés o que imite los usos propios de dicha lengua, ¿estaría de acuerdo en calificar los adverbios en “-mente” como anglicismos?	Personalmente, ¿considera aceptable, en general, usar adverbios en “-mente” al escribir en español y al traducir del inglés al español?	Definiéndose como construcción pasiva cualquier oración con el verbo “ser” + participio en que el sujeto gramatical adquiera el rol de paciente (p. ej., “La iglesia fue construida a comienzos del siglo XVIII”, “Pedro fue regañado por su Madre”), ¿cuál de las siguientes alternativas refleja su experiencia como estudiante de traducción?	Definiéndose como anglicismo cualquier uso lingüístico proveniente del inglés o que imite los usos propios de dicha lengua, ¿estaría de acuerdo en calificar las construcciones pasivas como anglicismos?	Personalmente, ¿considera aceptable, en general, usar construcciones pasivas al escribir en español y al traducir del inglés al español?	Respecto del uso de construcciones con el verbo “poder” + infinitivo (p. ej., “Al fin podré comer”, “Para poder participar hay que estar inscrito”), ¿cuál de las siguientes alternativas refleja su experiencia como estudiante de traducción?	Definiéndose como anglicismo cualquier uso lingüístico proveniente del inglés o que imite los usos propios de dicha lengua, ¿estaría de acuerdo en calificar las construcciones con “poder” + infinitivo como anglicismos?	Personalmente, ¿considera aceptable, en general, usar construcciones con “poder” + infinitivo al escribir en español y al traducir del inglés al español?
1	En general, mis profesores me han incentivado a utilizar gerundios en español o han mostrado una disposición favorable a este tipo de formas.	No.	Sí.	La disposición de mis profesores con respecto al uso de adjetivos antepuestos al sustantivo en español ha sido más bien heterogénea.	Yes	Yes	En general, mis profesores me han incentivado a utilizar construcciones adverbios en “-mente” o han mostrado una disposición favorable a este tipo de formas.	No.	Sí.	La disposición de mis profesores con respecto al uso de construcciones pasivas en español ha sido más bien heterogénea.n 4	Sí.	No.	En general, mis profesores me han incentivado a utilizar construcciones con poder + infinitivo en español o han mostrado una disposición favorable a este tipo de construcciones.	No.	Sí.
2	En general, mis profesores me han aconsejado evitar el uso de gerundios en español o han mostrado una disposición desfavorable a este tipo de formas.	No.	Sí.	La disposición de mis profesores con respecto al uso de adjetivos antepuestos al sustantivo en español ha sido más bien heterogénea.	No	Yes	En general, mis profesores me han aconsejado evitar el uso de adverbios en “-mente” o han mostrado una disposición desfavorable a este tipo de formas.	No.	Sí.	En general, mis profesores me han aconsejado evitar el uso de construcciones pasivas en español o han mostrado una disposición desfavorable a este tipo de construcción.	Sí.	Sí.	La disposición de mis profesores con respecto al uso de construcciones con el verbo "poder" + infinitivo en español ha sido más bien heterogénea.	No.	Sí.
3	En general, mis profesores me han aconsejado evitar el uso de gerundios en español o han mostrado una disposición desfavorable a este tipo de formas.	No.	Sí.	En general, mis profesores no se han referido a la posibilidad de utilizar adjetivos antepuestos al sustantivo en español o han mostrado una disposición neutral frente a este tipo de construcción.	No	Yes	La disposición de mis profesores con respecto al uso de adverbios con la terminación "-mente" en español ha sido más bien heterogénea.	No.	Sí.	En general, mis profesores no se han referido a la posibilidad de utilizar construcciones pasivas en español o han mostrado una disposición neutral frente a este tipo de construcción.	No.	Sí.	En general, mis profesores no se han referido a la posibilidad de utilizar construcciones con poder + infinitivo en español o han mostrado una disposición neutral a este tipo de construcciones.	No sabría decir.	Sí.
4	En general, mis profesores me han aconsejado evitar el uso de gerundios en español o han mostrado una disposición desfavorable a este tipo de formas.	No sabría decir.	No.	La disposición de mis profesores con respecto al uso de adjetivos antepuestos al sustantivo en español ha sido más bien heterogénea.	No	Yes	En general, mis profesores me han aconsejado evitar el uso de adverbios en “-mente” o han mostrado una disposición desfavorable a este tipo de formas.	Sí.	No.	En general, mis profesores me han aconsejado evitar el uso de construcciones pasivas en español o han mostrado una disposición desfavorable a este tipo de construcción.	No.	No.	En general, mis profesores no se han referido a la posibilidad de utilizar construcciones con poder + infinitivo en español o han mostrado una disposición neutral a este tipo de construcciones.	No.	Sí.
5	En general, mis profesores me han incentivado a utilizar gerundios en español o han mostrado una disposición favorable a este tipo de formas.	No.	Sí.	La disposición de mis profesores con respecto al uso de adjetivos antepuestos al sustantivo en español ha sido más bien heterogénea.	No	Yes	La disposición de mis profesores con respecto al uso de adverbios con la terminación "-mente" en español ha sido más bien heterogénea.	No.	Sí.	La disposición de mis profesores con respecto al uso de construcciones pasivas en español ha sido más bien heterogénea.n 4	No.	Sí.	La disposición de mis profesores con respecto al uso de construcciones con el verbo "poder" + infinitivo en español ha sido más bien heterogénea.	No.	Sí.
6	En general, mis profesores me han aconsejado evitar el uso de gerundios en español o han mostrado una disposición desfavorable a este tipo de formas.	No.	Sí.	En general, mis profesores me han aconsejado evitar el uso de adjetivos antepuestos al sustantivo en español o han mostrado una disposición desfavorable a este tipo de construcción.	No	Yes	La disposición de mis profesores con respecto al uso de adverbios con la terminación "-mente" en español ha sido más bien heterogénea.	No.	Sí.	En general, mis profesores me han aconsejado evitar el uso de construcciones pasivas en español o han mostrado una disposición desfavorable a este tipo de construcción.	No.	Sí.	En general, mis profesores no se han referido a la posibilidad de utilizar construcciones con poder + infinitivo en español o han mostrado una disposición neutral a este tipo de construcciones.	No.	Sí.
7	En general, mis profesores me han aconsejado evitar el uso de gerundios en español o han mostrado una disposición desfavorable a este tipo de formas.	No.	Sí.	En general, mis profesores me han aconsejado evitar el uso de adjetivos antepuestos al sustantivo en español o han mostrado una disposición desfavorable a este tipo de construcción.	No sabría decir.	Yes	En general, mis profesores me han incentivado a utilizar construcciones adverbios en “-mente” o han mostrado una disposición favorable a este tipo de formas.	No.	Sí.	En general, mis profesores me han aconsejado evitar el uso de construcciones pasivas en español o han mostrado una disposición desfavorable a este tipo de construcción.	No.	No.	En general, mis profesores no se han referido a la posibilidad de utilizar construcciones con poder + infinitivo en español o han mostrado una disposición neutral a este tipo de construcciones.	No sabría decir.	Sí.
8	En general, mis profesores me han incentivado a utilizar gerundios en español o han mostrado una disposición favorable a este tipo de formas.	No.	Sí.	En general, mis profesores me han aconsejado evitar el uso de adjetivos antepuestos al sustantivo en español o han mostrado una disposición desfavorable a este tipo de construcción.	No	Yes	En general, mis profesores me han incentivado a utilizar construcciones adverbios en “-mente” o han mostrado una disposición favorable a este tipo de formas.	No.	Sí.	En general, mis profesores me han aconsejado evitar el uso de construcciones pasivas en español o han mostrado una disposición desfavorable a este tipo de construcción.	Sí.	No.	En general, mis profesores no se han referido a la posibilidad de utilizar construcciones con poder + infinitivo en español o han mostrado una disposición neutral a este tipo de construcciones.	Sí.	No.
9	La disposición de mis profesores con respecto al uso de gerundios en español ha sido más bien heterogénea.	No.	Sí.	La disposición de mis profesores con respecto al uso de adjetivos antepuestos al sustantivo en español ha sido más bien heterogénea.	No	No	La disposición de mis profesores con respecto al uso de adverbios con la terminación "-mente" en español ha sido más bien heterogénea.	No.	Sí.	La disposición de mis profesores con respecto al uso de construcciones pasivas en español ha sido más bien heterogénea.n 4	No.	No.	En general, mis profesores no se han referido a la posibilidad de utilizar construcciones con poder + infinitivo en español o han mostrado una disposición neutral a este tipo de construcciones.	No.	Sí.
10	En general, mis profesores me han aconsejado evitar el uso de gerundios en español o han mostrado una disposición desfavorable a este tipo de formas.	No.	No.	En general, mis profesores me han aconsejado evitar el uso de adjetivos antepuestos al sustantivo en español o han mostrado una disposición desfavorable a este tipo de construcción.	No	No	La disposición de mis profesores con respecto al uso de adverbios con la terminación "-mente" en español ha sido más bien heterogénea.	No.	Sí.	La disposición de mis profesores con respecto al uso de construcciones pasivas en español ha sido más bien heterogénea.n 4	No.	No.	En general, mis profesores me han aconsejado evitar el uso de construcciones con poder + infinitivo en español o han mostrado una disposición desfavorable a este tipo de construcciones.	No.	No.
11	En general, mis profesores me han aconsejado evitar el uso de gerundios en español o han mostrado una disposición desfavorable a este tipo de formas.	No.	No.	En general, mis profesores me han aconsejado evitar el uso de adjetivos antepuestos al sustantivo en español o han mostrado una disposición desfavorable a este tipo de construcción.	No	No	En general, mis profesores me han incentivado a utilizar construcciones adverbios en “-mente” o han mostrado una disposición favorable a este tipo de formas.	No.	Sí.	En general, mis profesores me han aconsejado evitar el uso de construcciones pasivas en español o han mostrado una disposición desfavorable a este tipo de construcción.	No.	No.	La disposición de mis profesores con respecto al uso de construcciones con el verbo "poder" + infinitivo en español ha sido más bien heterogénea.	No.	Sí.
12	En general, mis profesores me han aconsejado evitar el uso de gerundios en español o han mostrado una disposición desfavorable a este tipo de formas.	No.	No.	La disposición de mis profesores con respecto al uso de adjetivos antepuestos al sustantivo en español ha sido más bien heterogénea.	No	Yes	En general, mis profesores me han aconsejado evitar el uso de adverbios en “-mente” o han mostrado una disposición desfavorable a este tipo de formas.	Sí.	No.	La disposición de mis profesores con respecto al uso de construcciones pasivas en español ha sido más bien heterogénea.n 4	Sí.	Sí.	La disposición de mis profesores con respecto al uso de construcciones con el verbo "poder" + infinitivo en español ha sido más bien heterogénea.	No.	Sí.
13	La disposición de mis profesores con respecto al uso de gerundios en español ha sido más bien heterogénea.	Sí.	No.	En general, mis profesores me han aconsejado evitar el uso de adjetivos antepuestos al sustantivo en español o han mostrado una disposición desfavorable a este tipo de construcción.	Yes	No	En general, mis profesores me han incentivado a utilizar construcciones adverbios en “-mente” o han mostrado una disposición favorable a este tipo de formas.	No sabría decir.	Sí.	En general, mis profesores me han aconsejado evitar el uso de construcciones pasivas en español o han mostrado una disposición desfavorable a este tipo de construcción.	Sí.	No.	La disposición de mis profesores con respecto al uso de construcciones con el verbo "poder" + infinitivo en español ha sido más bien heterogénea.	No.	Sí.
14	En general, mis profesores me han aconsejado evitar el uso de gerundios en español o han mostrado una disposición desfavorable a este tipo de formas.	No sabría decir.	No.	En general, mis profesores me han aconsejado evitar el uso de adjetivos antepuestos al sustantivo en español o han mostrado una disposición desfavorable a este tipo de construcción.	No sabría decir.	No	En general, mis profesores me han incentivado a utilizar construcciones adverbios en “-mente” o han mostrado una disposición favorable a este tipo de formas.	No sabría decir.	Sí.	En general, mis profesores me han aconsejado evitar el uso de construcciones pasivas en español o han mostrado una disposición desfavorable a este tipo de construcción.	Sí.	No.	En general, mis profesores no se han referido a la posibilidad de utilizar construcciones con poder + infinitivo en español o han mostrado una disposición neutral a este tipo de construcciones.	No sabría decir.	No.
15	En general, mis profesores me han aconsejado evitar el uso de gerundios en español o han mostrado una disposición desfavorable a este tipo de formas.	No.	Sí.	En general, mis profesores no se han referido a la posibilidad de utilizar adjetivos antepuestos al sustantivo en español o han mostrado una disposición neutral frente a este tipo de construcción.	No	Yes	En general, mis profesores me han aconsejado evitar el uso de adverbios en “-mente” o han mostrado una disposición desfavorable a este tipo de formas.	No.	Sí.	La disposición de mis profesores con respecto al uso de construcciones pasivas en español ha sido más bien heterogénea.n 4	No.	Sí.	En general, mis profesores no se han referido a la posibilidad de utilizar construcciones con poder + infinitivo en español o han mostrado una disposición neutral a este tipo de construcciones.	No.	Sí.
16	En general, mis profesores me han aconsejado evitar el uso de gerundios en español o han mostrado una disposición desfavorable a este tipo de formas.	No sabría decir.	Sí.	En general, mis profesores no se han referido a la posibilidad de utilizar adjetivos antepuestos al sustantivo en español o han mostrado una disposición neutral frente a este tipo de construcción.	Yes	No	En general, mis profesores me han aconsejado evitar el uso de adverbios en “-mente” o han mostrado una disposición desfavorable a este tipo de formas.	Sí.	Sí.	En general, mis profesores no se han referido a la posibilidad de utilizar construcciones pasivas en español o han mostrado una disposición neutral frente a este tipo de construcción.	Sí.	Sí.	En general, mis profesores no se han referido a la posibilidad de utilizar construcciones con poder + infinitivo en español o han mostrado una disposición neutral a este tipo de construcciones.	No.	Sí.
17	En general, mis profesores no se han referido a la posibilidad de utilizar gerundios en español o han mostrado una disposición neutral a este tipo de formas.	No.	Sí.	En general, mis profesores me han incentivado a utilizar adjetivos antepuestos al sustantivo en español o han mostrado una disposición favorable a este tipo de construcción.	No sabría decir.	Yes	En general, mis profesores no se han referido a la posibilidad de utilizar adverbios en “-mente” en español o han mostrado una disposición neutral frente a este tipo de formas.	No.	Sí.	En general, mis profesores me han incentivado a utilizar construcciones pasivas en español o han mostrado una disposición favorable a este tipo de construcción.	No.	Sí.	En general, mis profesores no se han referido a la posibilidad de utilizar construcciones con poder + infinitivo en español o han mostrado una disposición neutral a este tipo de construcciones.	No.	Sí.
18	En general, mis profesores me han incentivado a utilizar gerundios en español o han mostrado una disposición favorable a este tipo de formas.	No.	No.	La disposición de mis profesores con respecto al uso de adjetivos antepuestos al sustantivo en español ha sido más bien heterogénea.	No	Yes	En general, mis profesores me han incentivado a utilizar construcciones adverbios en “-mente” o han mostrado una disposición favorable a este tipo de formas.	No.	Sí.	En general, mis profesores me han aconsejado evitar el uso de construcciones pasivas en español o han mostrado una disposición desfavorable a este tipo de construcción.	Sí.	No.	En general, mis profesores no se han referido a la posibilidad de utilizar construcciones con poder + infinitivo en español o han mostrado una disposición neutral a este tipo de construcciones.	No sabría decir.	Sí.
19	En general, mis profesores me han aconsejado evitar el uso de gerundios en español o han mostrado una disposición desfavorable a este tipo de formas.	No.	Sí.	La disposición de mis profesores con respecto al uso de adjetivos antepuestos al sustantivo en español ha sido más bien heterogénea.	No	Yes	En general, mis profesores me han incentivado a utilizar construcciones adverbios en “-mente” o han mostrado una disposición favorable a este tipo de formas.	No.	Sí.	En general, mis profesores no se han referido a la posibilidad de utilizar construcciones pasivas en español o han mostrado una disposición neutral frente a este tipo de construcción.	No.	Sí.	En general, mis profesores no se han referido a la posibilidad de utilizar construcciones con poder + infinitivo en español o han mostrado una disposición neutral a este tipo de construcciones.	No.	Sí.
20	En general, mis profesores me han aconsejado evitar el uso de gerundios en español o han mostrado una disposición desfavorable a este tipo de formas.	No.	No.	En general, mis profesores no se han referido a la posibilidad de utilizar adjetivos antepuestos al sustantivo en español o han mostrado una disposición neutral frente a este tipo de construcción.	No	Yes	La disposición de mis profesores con respecto al uso de adverbios con la terminación "-mente" en español ha sido más bien heterogénea.	No.	Sí.	En general, mis profesores me han aconsejado evitar el uso de construcciones pasivas en español o han mostrado una disposición desfavorable a este tipo de construcción.	Sí.	No.	En general, mis profesores me han incentivado a utilizar construcciones con poder + infinitivo en español o han mostrado una disposición favorable a este tipo de construcciones.	No.	Sí.
21	En general, mis profesores me han aconsejado evitar el uso de gerundios en español o han mostrado una disposición desfavorable a este tipo de formas.	No.	Sí.	La disposición de mis profesores con respecto al uso de adjetivos antepuestos al sustantivo en español ha sido más bien heterogénea.	Yes	No	La disposición de mis profesores con respecto al uso de adverbios con la terminación "-mente" en español ha sido más bien heterogénea.	No.	Sí.	En general, mis profesores me han aconsejado evitar el uso de construcciones pasivas en español o han mostrado una disposición desfavorable a este tipo de construcción.	Sí.	No.	En general, mis profesores no se han referido a la posibilidad de utilizar construcciones con poder + infinitivo en español o han mostrado una disposición neutral a este tipo de construcciones.	No.	Sí.
22	La disposición de mis profesores con respecto al uso de gerundios en español ha sido más bien heterogénea.	No.	Sí.	En general, mis profesores no se han referido a la posibilidad de utilizar adjetivos antepuestos al sustantivo en español o han mostrado una disposición neutral frente a este tipo de construcción.	Yes	No	En general, mis profesores me han incentivado a utilizar construcciones adverbios en “-mente” o han mostrado una disposición favorable a este tipo de formas.	No.	Sí.	En general, mis profesores me han aconsejado evitar el uso de construcciones pasivas en español o han mostrado una disposición desfavorable a este tipo de construcción.	No sabría decir.	Sí.	En general, mis profesores no se han referido a la posibilidad de utilizar construcciones con poder + infinitivo en español o han mostrado una disposición neutral a este tipo de construcciones.	No sabría decir.	Sí.
23	En general, mis profesores me han aconsejado evitar el uso de gerundios en español o han mostrado una disposición desfavorable a este tipo de formas.	Sí.	No.	En general, mis profesores me han aconsejado evitar el uso de adjetivos antepuestos al sustantivo en español o han mostrado una disposición desfavorable a este tipo de construcción.	Yes	Yes	En general, mis profesores me han aconsejado evitar el uso de adverbios en “-mente” o han mostrado una disposición desfavorable a este tipo de formas.	No.	Sí.	En general, mis profesores me han aconsejado evitar el uso de construcciones pasivas en español o han mostrado una disposición desfavorable a este tipo de construcción.	Sí.	Sí.	En general, mis profesores no se han referido a la posibilidad de utilizar construcciones con poder + infinitivo en español o han mostrado una disposición neutral a este tipo de construcciones.	Sí.	Sí.
24	En general, mis profesores me han incentivado a utilizar gerundios en español o han mostrado una disposición favorable a este tipo de formas.	No.	Sí.	La disposición de mis profesores con respecto al uso de adjetivos antepuestos al sustantivo en español ha sido más bien heterogénea.	No	No	En general, mis profesores no se han referido a la posibilidad de utilizar adverbios en “-mente” en español o han mostrado una disposición neutral frente a este tipo de formas.	No.	Sí.	En general, mis profesores no se han referido a la posibilidad de utilizar construcciones pasivas en español o han mostrado una disposición neutral frente a este tipo de construcción.	No.	Sí.	En general, mis profesores no se han referido a la posibilidad de utilizar construcciones con poder + infinitivo en español o han mostrado una disposición neutral a este tipo de construcciones.	No.	Sí.
25	En general, mis profesores me han aconsejado evitar el uso de gerundios en español o han mostrado una disposición desfavorable a este tipo de formas.	No.	Sí.	La disposición de mis profesores con respecto al uso de adjetivos antepuestos al sustantivo en español ha sido más bien heterogénea.	Yes	Yes	En general, mis profesores me han aconsejado evitar el uso de adverbios en “-mente” o han mostrado una disposición desfavorable a este tipo de formas.	No.	Sí.	En general, mis profesores me han aconsejado evitar el uso de construcciones pasivas en español o han mostrado una disposición desfavorable a este tipo de construcción.	Sí.	No.	En general, mis profesores me han incentivado a utilizar construcciones con poder + infinitivo en español o han mostrado una disposición favorable a este tipo de construcciones.	No.	Sí.
26	En general, mis profesores me han aconsejado evitar el uso de gerundios en español o han mostrado una disposición desfavorable a este tipo de formas.	No.	Sí.	En general, mis profesores me han aconsejado evitar el uso de adjetivos antepuestos al sustantivo en español o han mostrado una disposición desfavorable a este tipo de construcción.	No sabría decir.	No	La disposición de mis profesores con respecto al uso de adverbios con la terminación "-mente" en español ha sido más bien heterogénea.	No sabría decir.	Sí.	En general, mis profesores me han aconsejado evitar el uso de construcciones pasivas en español o han mostrado una disposición desfavorable a este tipo de construcción.	No sabría decir.	Sí.	En general, mis profesores no se han referido a la posibilidad de utilizar construcciones con poder + infinitivo en español o han mostrado una disposición neutral a este tipo de construcciones.	No sabría decir.	Sí.
27	En general, mis profesores me han incentivado a utilizar gerundios en español o han mostrado una disposición favorable a este tipo de formas.	No sabría decir.	Sí.	En general, mis profesores no se han referido a la posibilidad de utilizar adjetivos antepuestos al sustantivo en español o han mostrado una disposición neutral frente a este tipo de construcción.	No	Yes	La disposición de mis profesores con respecto al uso de adverbios con la terminación "-mente" en español ha sido más bien heterogénea.	No.	Sí.	En general, mis profesores me han aconsejado evitar el uso de construcciones pasivas en español o han mostrado una disposición desfavorable a este tipo de construcción.	Sí.	No.	La disposición de mis profesores con respecto al uso de construcciones con el verbo "poder" + infinitivo en español ha sido más bien heterogénea.	No sabría decir.	No.
28	En general, mis profesores me han aconsejado evitar el uso de gerundios en español o han mostrado una disposición desfavorable a este tipo de formas.	Sí.	Sí.	En general, mis profesores me han aconsejado evitar el uso de adjetivos antepuestos al sustantivo en español o han mostrado una disposición desfavorable a este tipo de construcción.	Yes	Yes	En general, mis profesores no se han referido a la posibilidad de utilizar adverbios en “-mente” en español o han mostrado una disposición neutral frente a este tipo de formas.	No sabría decir.	Sí.	En general, mis profesores me han aconsejado evitar el uso de construcciones pasivas en español o han mostrado una disposición desfavorable a este tipo de construcción.	No.	Sí.	En general, mis profesores me han aconsejado evitar el uso de construcciones con poder + infinitivo en español o han mostrado una disposición desfavorable a este tipo de construcciones.	No.	Sí.
29	La disposición de mis profesores con respecto al uso de gerundios en español ha sido más bien heterogénea.	No.	No.	En general, mis profesores me han aconsejado evitar el uso de adjetivos antepuestos al sustantivo en español o han mostrado una disposición desfavorable a este tipo de construcción.	No	Yes	En general, mis profesores no se han referido a la posibilidad de utilizar adverbios en “-mente” en español o han mostrado una disposición neutral frente a este tipo de formas.	No.	Sí.	En general, mis profesores me han aconsejado evitar el uso de construcciones pasivas en español o han mostrado una disposición desfavorable a este tipo de construcción.	No sabría decir.	No.	En general, mis profesores no se han referido a la posibilidad de utilizar construcciones con poder + infinitivo en español o han mostrado una disposición neutral a este tipo de construcciones.	No.	Sí.
30	En general, mis profesores me han aconsejado evitar el uso de gerundios en español o han mostrado una disposición desfavorable a este tipo de formas.	No.	No.	La disposición de mis profesores con respecto al uso de adjetivos antepuestos al sustantivo en español ha sido más bien heterogénea.	No	No	En general, mis profesores no se han referido a la posibilidad de utilizar adverbios en “-mente” en español o han mostrado una disposición neutral frente a este tipo de formas.	No.	Sí.	En general, mis profesores me han aconsejado evitar el uso de construcciones pasivas en español o han mostrado una disposición desfavorable a este tipo de construcción.	Sí.	No.	En general, mis profesores no se han referido a la posibilidad de utilizar construcciones con poder + infinitivo en español o han mostrado una disposición neutral a este tipo de construcciones.	No.	Sí.
31	En general, mis profesores me han aconsejado evitar el uso de gerundios en español o han mostrado una disposición desfavorable a este tipo de formas.	No.	No.	La disposición de mis profesores con respecto al uso de adjetivos antepuestos al sustantivo en español ha sido más bien heterogénea.	No	Yes	En general, mis profesores me han aconsejado evitar el uso de adverbios en “-mente” o han mostrado una disposición desfavorable a este tipo de formas.	No.	Sí.	En general, mis profesores me han aconsejado evitar el uso de construcciones pasivas en español o han mostrado una disposición desfavorable a este tipo de construcción.	No.	Sí.	En general, mis profesores no se han referido a la posibilidad de utilizar construcciones con poder + infinitivo en español o han mostrado una disposición neutral a este tipo de construcciones.	No.	Sí.
32	La disposición de mis profesores con respecto al uso de gerundios en español ha sido más bien heterogénea.	No.	Sí.	En general, mis profesores me han aconsejado evitar el uso de adjetivos antepuestos al sustantivo en español o han mostrado una disposición desfavorable a este tipo de construcción.	Yes	No	La disposición de mis profesores con respecto al uso de adverbios con la terminación "-mente" en español ha sido más bien heterogénea.	No.	Sí.	En general, mis profesores me han aconsejado evitar el uso de construcciones pasivas en español o han mostrado una disposición desfavorable a este tipo de construcción.	Sí.	No.	En general, mis profesores no se han referido a la posibilidad de utilizar construcciones con poder + infinitivo en español o han mostrado una disposición neutral a este tipo de construcciones.	No sabría decir.	Sí.
33	En general, mis profesores me han aconsejado evitar el uso de gerundios en español o han mostrado una disposición desfavorable a este tipo de formas.	No.	Sí.	La disposición de mis profesores con respecto al uso de adjetivos antepuestos al sustantivo en español ha sido más bien heterogénea.	Yes	Yes	En general, mis profesores me han incentivado a utilizar adverbios en “-mente” o han mostrado una disposición favorable a este tipo de formas.	No.	Sí.	En general, mis profesores me han aconsejado evitar el uso de construcciones pasivas en español o han mostrado una disposición desfavorable a este tipo de construcción.	Sí.	No.	La disposición de mis profesores con respecto al uso de construcciones con el verbo "poder" + infinitivo en español ha sido más bien heterogénea.	No.	Sí.
34	En general, mis profesores me han aconsejado evitar el uso de gerundios en español o han mostrado una disposición desfavorable a este tipo de formas.	No sabría decir.	Sí.	En general, mis profesores me han aconsejado evitar el uso de adjetivos antepuestos al sustantivo en español o han mostrado una disposición desfavorable a este tipo de construcción.	No	Yes	En general, mis profesores no se han referido a la posibilidad de utilizar adverbios en “-mente” en español o han mostrado una disposición neutral frente a este tipo de formas.	No.	Sí.	En general, mis profesores me han aconsejado evitar el uso de construcciones pasivas en español o han mostrado una disposición desfavorable a este tipo de construcción.	Sí.	No.	En general, mis profesores no se han referido a la posibilidad de utilizar construcciones con poder + infinitivo en español o han mostrado una disposición neutral a este tipo de construcciones.	No.	No.
35	En general, mis profesores me han incentivado a utilizar gerundios en español o han mostrado una disposición favorable a este tipo de formas.	No.	Sí.	La disposición de mis profesores con respecto al uso de adjetivos antepuestos al sustantivo en español ha sido más bien heterogénea.	Yes	No	En general, mis profesores no se han referido a la posibilidad de utilizar adverbios en “-mente” en español o han mostrado una disposición neutral frente a este tipo de formas.	No.	Sí.	En general, mis profesores me han aconsejado evitar el uso de construcciones pasivas en español o han mostrado una disposición desfavorable a este tipo de construcción.	Sí.	No.	En general, mis profesores no se han referido a la posibilidad de utilizar construcciones con poder + infinitivo en español o han mostrado una disposición neutral a este tipo de construcciones.	No sabría decir.	Sí.
36	En general, mis profesores me han aconsejado evitar el uso de gerundios en español o han mostrado una disposición desfavorable a este tipo de formas.	No sabría decir.	No.	En general, mis profesores me han aconsejado evitar el uso de adjetivos antepuestos al sustantivo en español o han mostrado una disposición desfavorable a este tipo de construcción.	No sabría decir.	No	En general, mis profesores no se han referido a la posibilidad de utilizar adverbios en “-mente” en español o han mostrado una disposición neutral frente a este tipo de formas.	No sabría decir.	Sí.	En general, mis profesores me han aconsejado evitar el uso de construcciones pasivas en español o han mostrado una disposición desfavorable a este tipo de construcción.	No sabría decir.	No.	En general, mis profesores no se han referido a la posibilidad de utilizar construcciones con poder + infinitivo en español o han mostrado una disposición neutral a este tipo de construcciones.	No sabría decir.	Sí.
37	En general, mis profesores me han aconsejado evitar el uso de gerundios en español o han mostrado una disposición desfavorable a este tipo de formas.	No.	Sí.	La disposición de mis profesores con respecto al uso de adjetivos antepuestos al sustantivo en español ha sido más bien heterogénea.	No	Yes	La disposición de mis profesores con respecto al uso de adverbios con la terminación "-mente" en español ha sido más bien heterogénea.	No.	Sí.	En general, mis profesores me han aconsejado evitar el uso de construcciones pasivas en español o han mostrado una disposición desfavorable a este tipo de construcción.	No.	Sí.	La disposición de mis profesores con respecto al uso de construcciones con el verbo "poder" + infinitivo en español ha sido más bien heterogénea.	No sabría decir.	Sí.
38	La disposición de mis profesores con respecto al uso de gerundios en español ha sido más bien heterogénea.	No.	No.	En general, mis profesores me han aconsejado evitar el uso de adjetivos antepuestos al sustantivo en español o han mostrado una disposición desfavorable a este tipo de construcción.	Yes	No	La disposición de mis profesores con respecto al uso de adverbios con la terminación "-mente" en español ha sido más bien heterogénea.	Sí.	No.	La disposición de mis profesores con respecto al uso de construcciones pasivas en español ha sido más bien heterogénea.n 4	Sí.	Sí.	En general, mis profesores no se han referido a la posibilidad de utilizar construcciones con poder + infinitivo en español o han mostrado una disposición neutral a este tipo de construcciones.	No sabría decir.	Sí.
39	En general, mis profesores me han aconsejado evitar el uso de gerundios en español o han mostrado una disposición desfavorable a este tipo de formas.	No.	No.	En general, mis profesores no se han referido a la posibilidad de utilizar adjetivos antepuestos al sustantivo en español o han mostrado una disposición neutral frente a este tipo de construcción.	Yes	No	En general, mis profesores me han aconsejado evitar el uso de adverbios en “-mente” o han mostrado una disposición desfavorable a este tipo de formas.	No.	No.	En general, mis profesores me han aconsejado evitar el uso de construcciones pasivas en español o han mostrado una disposición desfavorable a este tipo de construcción.	Sí.	No.	En general, mis profesores no se han referido a la posibilidad de utilizar construcciones con poder + infinitivo en español o han mostrado una disposición neutral a este tipo de construcciones.	No sabría decir.	Sí.
40	En general, mis profesores me han aconsejado evitar el uso de gerundios en español o han mostrado una disposición desfavorable a este tipo de formas.	No.	No.	En general, mis profesores me han aconsejado evitar el uso de adjetivos antepuestos al sustantivo en español o han mostrado una disposición desfavorable a este tipo de construcción.	No	Yes	La disposición de mis profesores con respecto al uso de adverbios con la terminación "-mente" en español ha sido más bien heterogénea.	No.	Sí.	En general, mis profesores me han aconsejado evitar el uso de construcciones pasivas en español o han mostrado una disposición desfavorable a este tipo de construcción.	Sí.	No.	En general, mis profesores no se han referido a la posibilidad de utilizar construcciones con poder + infinitivo en español o han mostrado una disposición neutral a este tipo de construcciones.	No.	Sí.
41	En general, mis profesores me han aconsejado evitar el uso de gerundios en español o han mostrado una disposición desfavorable a este tipo de formas.	Sí.	Sí.	En general, mis profesores me han aconsejado evitar el uso de adjetivos antepuestos al sustantivo en español o han mostrado una disposición desfavorable a este tipo de construcción.	Yes	No	En general, mis profesores me han aconsejado evitar el uso de adverbios en “-mente” o han mostrado una disposición desfavorable a este tipo de formas.	Sí.	Sí.	En general, mis profesores me han aconsejado evitar el uso de construcciones pasivas en español o han mostrado una disposición desfavorable a este tipo de construcción.	Sí.	No.	En general, mis profesores me han aconsejado evitar el uso de construcciones con poder + infinitivo en español o han mostrado una disposición desfavorable a este tipo de construcciones.	No sabría decir.	Sí.
42	En general, mis profesores me han aconsejado evitar el uso de gerundios en español o han mostrado una disposición desfavorable a este tipo de formas.	No.	No.	La disposición de mis profesores con respecto al uso de adjetivos antepuestos al sustantivo en español ha sido más bien heterogénea.	Yes	No	En general, mis profesores me han aconsejado evitar el uso de adverbios en “-mente” o han mostrado una disposición desfavorable a este tipo de formas.	No.	No.	En general, mis profesores me han aconsejado evitar el uso de construcciones pasivas en español o han mostrado una disposición desfavorable a este tipo de construcción.	No sabría decir.	No.	En general, mis profesores no se han referido a la posibilidad de utilizar construcciones con poder + infinitivo en español o han mostrado una disposición neutral a este tipo de construcciones.	No.	Sí.
43	En general, mis profesores me han aconsejado evitar el uso de gerundios en español o han mostrado una disposición desfavorable a este tipo de formas.	No sabría decir.	Sí.	La disposición de mis profesores con respecto al uso de adjetivos antepuestos al sustantivo en español ha sido más bien heterogénea.	No sabría decir.	Yes	La disposición de mis profesores con respecto al uso de adverbios con la terminación "-mente" en español ha sido más bien heterogénea.	No.	No.	En general, mis profesores me han aconsejado evitar el uso de construcciones pasivas en español o han mostrado una disposición desfavorable a este tipo de construcción.	No sabría decir.	No.	En general, mis profesores no se han referido a la posibilidad de utilizar construcciones con poder + infinitivo en español o han mostrado una disposición neutral a este tipo de construcciones.	No sabría decir.	Sí.
44	En general, mis profesores me han aconsejado evitar el uso de gerundios en español o han mostrado una disposición desfavorable a este tipo de formas.	No.	No.	En general, mis profesores me han aconsejado evitar el uso de adjetivos antepuestos al sustantivo en español o han mostrado una disposición desfavorable a este tipo de construcción.	No	Yes	En general, mis profesores no se han referido a la posibilidad de utilizar adverbios en “-mente” en español o han mostrado una disposición neutral frente a este tipo de formas.	No sabría decir.	Sí.	En general, mis profesores me han aconsejado evitar el uso de construcciones pasivas en español o han mostrado una disposición desfavorable a este tipo de construcción.	No.	No.	La disposición de mis profesores con respecto al uso de construcciones con el verbo "poder" + infinitivo en español ha sido más bien heterogénea.	No sabría decir.	Sí.
45	En general, mis profesores me han aconsejado evitar el uso de gerundios en español o han mostrado una disposición desfavorable a este tipo de formas.	No.	No.	En general, mis profesores no se han referido a la posibilidad de utilizar adjetivos antepuestos al sustantivo en español o han mostrado una disposición neutral frente a este tipo de construcción.	No	Yes	En general, mis profesores me han aconsejado evitar el uso de adverbios en “-mente” o han mostrado una disposición desfavorable a este tipo de formas.	No.	Sí.	En general, mis profesores me han aconsejado evitar el uso de construcciones pasivas en español o han mostrado una disposición desfavorable a este tipo de construcción.	No.	No.	En general, mis profesores no se han referido a la posibilidad de utilizar construcciones con poder + infinitivo en español o han mostrado una disposición neutral a este tipo de construcciones.	No sabría decir.	Sí.
46	En general, mis profesores me han aconsejado evitar el uso de gerundios en español o han mostrado una disposición desfavorable a este tipo de formas.	No.	Sí.	En general, mis profesores me han aconsejado evitar el uso de adjetivos antepuestos al sustantivo en español o han mostrado una disposición desfavorable a este tipo de construcción.	Yes	No	La disposición de mis profesores con respecto al uso de adverbios con la terminación "-mente" en español ha sido más bien heterogénea.	No.	Sí.	En general, mis profesores me han aconsejado evitar el uso de construcciones pasivas en español o han mostrado una disposición desfavorable a este tipo de construcción.	Sí.	No.	En general, mis profesores no se han referido a la posibilidad de utilizar construcciones con poder + infinitivo en español o han mostrado una disposición neutral a este tipo de construcciones.	No.	Sí.
47	En general, mis profesores me han aconsejado evitar el uso de gerundios en español o han mostrado una disposición desfavorable a este tipo de formas.	No sabría decir.	Sí.	La disposición de mis profesores con respecto al uso de adjetivos antepuestos al sustantivo en español ha sido más bien heterogénea.	No	Yes	En general, mis profesores me han aconsejado evitar el uso de adverbios en “-mente” o han mostrado una disposición desfavorable a este tipo de formas.	No.	Sí.	En general, mis profesores me han aconsejado evitar el uso de construcciones pasivas en español o han mostrado una disposición desfavorable a este tipo de construcción.	No sabría decir.	Sí.	En general, mis profesores no se han referido a la posibilidad de utilizar construcciones con poder + infinitivo en español o han mostrado una disposición neutral a este tipo de construcciones.	No.	Sí.
48	En general, mis profesores me han aconsejado evitar el uso de gerundios en español o han mostrado una disposición desfavorable a este tipo de formas.	Sí.	No.	En general, mis profesores me han aconsejado evitar el uso de adjetivos antepuestos al sustantivo en español o han mostrado una disposición desfavorable a este tipo de construcción.	No sabría decir.	Yes	En general, mis profesores me han aconsejado evitar el uso de adverbios en “-mente” o han mostrado una disposición desfavorable a este tipo de formas.	No sabría decir.	No.	La disposición de mis profesores con respecto al uso de construcciones pasivas en español ha sido más bien heterogénea.n 4	No sabría decir.	Sí.	En general, mis profesores me han incentivado a utilizar construcciones con poder + infinitivo en español o han mostrado una disposición favorable a este tipo de construcciones.	No.	Sí.
49	En general, mis profesores me han aconsejado evitar el uso de gerundios en español o han mostrado una disposición desfavorable a este tipo de formas.	No.	No.	En general, mis profesores no se han referido a la posibilidad de utilizar adjetivos antepuestos al sustantivo en español o han mostrado una disposición neutral frente a este tipo de construcción.	No sabría decir.	No	En general, mis profesores me han aconsejado evitar el uso de adverbios en “-mente” o han mostrado una disposición desfavorable a este tipo de formas.	No.	No.	En general, mis profesores no se han referido a la posibilidad de utilizar construcciones pasivas en español o han mostrado una disposición neutral frente a este tipo de construcción.	No sabría decir.	Sí.	En general, mis profesores no se han referido a la posibilidad de utilizar construcciones con poder + infinitivo en español o han mostrado una disposición neutral a este tipo de construcciones.	No sabría decir.	Sí.
50	En general, mis profesores no se han referido a la posibilidad de utilizar gerundios en español o han mostrado una disposición neutral a este tipo de formas.	No.	Sí.	En general, mis profesores no se han referido a la posibilidad de utilizar adjetivos antepuestos al sustantivo en español o han mostrado una disposición neutral frente a este tipo de construcción.	No	Yes	En general, mis profesores me han incentivado a utilizar adverbios en “-mente” o han mostrado una disposición favorable a este tipo de formas.	No sabría decir.	Sí.	En general, mis profesores me han incentivado a utilizar construcciones pasivas en español o han mostrado una disposición favorable a este tipo de construcción.	Sí.	Sí.	En general, mis profesores me han incentivado a utilizar construcciones con poder + infinitivo en español o han mostrado una disposición favorable a este tipo de construcciones.	Sí.	Sí.
51	En general, mis profesores me han aconsejado evitar el uso de gerundios en español o han mostrado una disposición desfavorable a este tipo de formas.	No.	Sí.	En general, mis profesores me han aconsejado evitar el uso de adjetivos antepuestos al sustantivo en español o han mostrado una disposición desfavorable a este tipo de construcción.	No sabría decir.	No	En general, mis profesores me han incentivado a utilizar adverbios en “-mente” o han mostrado una disposición favorable a este tipo de formas.	No.	Sí.	En general, mis profesores me han aconsejado evitar el uso de construcciones pasivas en español o han mostrado una disposición desfavorable a este tipo de construcción.	Sí.	No.	La disposición de mis profesores con respecto al uso de construcciones con el verbo "poder" + infinitivo en español ha sido más bien heterogénea.	No sabría decir.	Sí.
52	En general, mis profesores me han aconsejado evitar el uso de gerundios en español o han mostrado una disposición desfavorable a este tipo de formas.	No.	Sí.	En general, mis profesores me han aconsejado evitar el uso de adjetivos antepuestos al sustantivo en español o han mostrado una disposición desfavorable a este tipo de construcción.	Yes	No	La disposición de mis profesores con respecto al uso de adverbios con la terminación "-mente" en español ha sido más bien heterogénea.	No.	Sí.	En general, mis profesores me han aconsejado evitar el uso de construcciones pasivas en español o han mostrado una disposición desfavorable a este tipo de construcción.	Sí.	Sí.	La disposición de mis profesores con respecto al uso de construcciones con el verbo "poder" + infinitivo en español ha sido más bien heterogénea.	No.	Sí.
53	La disposición de mis profesores con respecto al uso de gerundios en español ha sido más bien heterogénea.	No.	Sí.	En general, mis profesores no se han referido a la posibilidad de utilizar adjetivos antepuestos al sustantivo en español o han mostrado una disposición neutral frente a este tipo de construcción.	No	Yes	En general, mis profesores no se han referido a la posibilidad de utilizar adverbios en “-mente” en español o han mostrado una disposición neutral frente a este tipo de formas.	No.	Sí.	En general, mis profesores me han aconsejado evitar el uso de construcciones pasivas en español o han mostrado una disposición desfavorable a este tipo de construcción.	Sí.	No.	En general, mis profesores no se han referido a la posibilidad de utilizar construcciones con poder + infinitivo en español o han mostrado una disposición neutral a este tipo de construcciones.	Sí.	Sí.
54	La disposición de mis profesores con respecto al uso de gerundios en español ha sido más bien heterogénea.	No sabría decir.	Sí.	En general, mis profesores me han aconsejado evitar el uso de adjetivos antepuestos al sustantivo en español o han mostrado una disposición desfavorable a este tipo de construcción.	No	Yes	En general, mis profesores no se han referido a la posibilidad de utilizar adverbios en “-mente” en español o han mostrado una disposición neutral frente a este tipo de formas.	No.	Sí.	La disposición de mis profesores con respecto al uso de construcciones pasivas en español ha sido más bien heterogénea.n 4	No.	Sí.	En general, mis profesores no se han referido a la posibilidad de utilizar construcciones con poder + infinitivo en español o han mostrado una disposición neutral a este tipo de construcciones.	No.	Sí.
55	En general, mis profesores me han aconsejado evitar el uso de gerundios en español o han mostrado una disposición desfavorable a este tipo de formas.	No.	No.	La disposición de mis profesores con respecto al uso de adjetivos antepuestos al sustantivo en español ha sido más bien heterogénea.	No	No	En general, mis profesores me han aconsejado evitar el uso de adverbios en “-mente” o han mostrado una disposición desfavorable a este tipo de formas.	No sabría decir.	Sí.	En general, mis profesores me han aconsejado evitar el uso de construcciones pasivas en español o han mostrado una disposición desfavorable a este tipo de construcción.	Sí.	No.	En general, mis profesores no se han referido a la posibilidad de utilizar construcciones con poder + infinitivo en español o han mostrado una disposición neutral a este tipo de construcciones.	No.	Sí.
56	En general, mis profesores me han aconsejado evitar el uso de gerundios en español o han mostrado una disposición desfavorable a este tipo de formas.	No.	No.	La disposición de mis profesores con respecto al uso de adjetivos antepuestos al sustantivo en español ha sido más bien heterogénea.	Yes	No	La disposición de mis profesores con respecto al uso de adverbios con la terminación "-mente" en español ha sido más bien heterogénea.	No.	Sí.	En general, mis profesores me han aconsejado evitar el uso de construcciones pasivas en español o han mostrado una disposición desfavorable a este tipo de construcción.	Sí.	No.	En general, mis profesores no se han referido a la posibilidad de utilizar construcciones con poder + infinitivo en español o han mostrado una disposición neutral a este tipo de construcciones.	Sí.	No.
57	En general, mis profesores me han aconsejado evitar el uso de gerundios en español o han mostrado una disposición desfavorable a este tipo de formas.	No.	Sí.	En general, mis profesores me han aconsejado evitar el uso de adjetivos antepuestos al sustantivo en español o han mostrado una disposición desfavorable a este tipo de construcción.	Yes	No	La disposición de mis profesores con respecto al uso de adverbios con la terminación "-mente" en español ha sido más bien heterogénea.	No.	Sí.	En general, mis profesores me han aconsejado evitar el uso de construcciones pasivas en español o han mostrado una disposición desfavorable a este tipo de construcción.	Sí.	No.	La disposición de mis profesores con respecto al uso de construcciones con el verbo "poder" + infinitivo en español ha sido más bien heterogénea.	No.	Sí.
58	En general, mis profesores me han aconsejado evitar el uso de gerundios en español o han mostrado una disposición desfavorable a este tipo de formas.	Sí.	No.	En general, mis profesores me han aconsejado evitar el uso de adjetivos antepuestos al sustantivo en español o han mostrado una disposición desfavorable a este tipo de construcción.	Yes	No	La disposición de mis profesores con respecto al uso de adverbios con la terminación "-mente" en español ha sido más bien heterogénea.	No sabría decir.	Sí.	En general, mis profesores me han aconsejado evitar el uso de construcciones pasivas en español o han mostrado una disposición desfavorable a este tipo de construcción.	Sí.	No.	En general, mis profesores no se han referido a la posibilidad de utilizar construcciones con poder + infinitivo en español o han mostrado una disposición neutral a este tipo de construcciones.	No sabría decir.	Sí.
59	En general, mis profesores me han aconsejado evitar el uso de gerundios en español o han mostrado una disposición desfavorable a este tipo de formas.	No sabría decir.	No.	En general, mis profesores me han aconsejado evitar el uso de adjetivos antepuestos al sustantivo en español o han mostrado una disposición desfavorable a este tipo de construcción.	Yes	Yes	En general, mis profesores no se han referido a la posibilidad de utilizar adverbios en “-mente” en español o han mostrado una disposición neutral frente a este tipo de formas.	No.	Sí.	En general, mis profesores me han aconsejado evitar el uso de construcciones pasivas en español o han mostrado una disposición desfavorable a este tipo de construcción.	No.	Sí.	En general, mis profesores me han aconsejado evitar el uso de construcciones con poder + infinitivo en español o han mostrado una disposición desfavorable a este tipo de construcciones.	No sabría decir.	Sí.
60	En general, mis profesores me han aconsejado evitar el uso de gerundios en español o han mostrado una disposición desfavorable a este tipo de formas.	No.	Sí.	En general, mis profesores no se han referido a la posibilidad de utilizar adjetivos antepuestos al sustantivo en español o han mostrado una disposición neutral frente a este tipo de construcción.	No sabría decir.	Yes	En general, mis profesores me han incentivado a utilizar adverbios en “-mente” o han mostrado una disposición favorable a este tipo de formas.	No.	Sí.	La disposición de mis profesores con respecto al uso de construcciones pasivas en español ha sido más bien heterogénea.n 4	Sí.	Sí.	En general, mis profesores no se han referido a la posibilidad de utilizar construcciones con poder + infinitivo en español o han mostrado una disposición neutral a este tipo de construcciones.	No.	Sí.
61	En general, mis profesores me han aconsejado evitar el uso de gerundios en español o han mostrado una disposición desfavorable a este tipo de formas.	No.	No.	En general, mis profesores me han aconsejado evitar el uso de adjetivos antepuestos al sustantivo en español o han mostrado una disposición desfavorable a este tipo de construcción.	Yes	No	En general, mis profesores no se han referido a la posibilidad de utilizar adverbios en “-mente” en español o han mostrado una disposición neutral frente a este tipo de formas.	No.	Sí.	En general, mis profesores me han aconsejado evitar el uso de construcciones pasivas en español o han mostrado una disposición desfavorable a este tipo de construcción.	Sí.	No.	En general, mis profesores no se han referido a la posibilidad de utilizar construcciones con poder + infinitivo en español o han mostrado una disposición neutral a este tipo de construcciones.	No.	Sí.
62	En general, mis profesores me han aconsejado evitar el uso de gerundios en español o han mostrado una disposición desfavorable a este tipo de formas.	Sí.	No.	En general, mis profesores me han aconsejado evitar el uso de adjetivos antepuestos al sustantivo en español o han mostrado una disposición desfavorable a este tipo de construcción.	Yes	No	La disposición de mis profesores con respecto al uso de adverbios con la terminación "-mente" en español ha sido más bien heterogénea.	No sabría decir.	Sí.	En general, mis profesores me han aconsejado evitar el uso de construcciones pasivas en español o han mostrado una disposición desfavorable a este tipo de construcción.	Sí.	No.	La disposición de mis profesores con respecto al uso de construcciones con el verbo "poder" + infinitivo en español ha sido más bien heterogénea.	No sabría decir.	Sí.
63	La disposición de mis profesores con respecto al uso de gerundios en español ha sido más bien heterogénea.	No.	Sí.	En general, mis profesores no se han referido a la posibilidad de utilizar adjetivos antepuestos al sustantivo en español o han mostrado una disposición neutral frente a este tipo de construcción.	No	Yes	En general, mis profesores me han aconsejado evitar el uso de adverbios en “-mente” o han mostrado una disposición desfavorable a este tipo de formas.	No.	Sí.	En general, mis profesores me han aconsejado evitar el uso de construcciones pasivas en español o han mostrado una disposición desfavorable a este tipo de construcción.	No.	Sí.	En general, mis profesores no se han referido a la posibilidad de utilizar construcciones con poder + infinitivo en español o han mostrado una disposición neutral a este tipo de construcciones.	No.	Sí.
64	En general, mis profesores me han aconsejado evitar el uso de gerundios en español o han mostrado una disposición desfavorable a este tipo de formas.	No.	No.	En general, mis profesores me han aconsejado evitar el uso de adjetivos antepuestos al sustantivo en español o han mostrado una disposición desfavorable a este tipo de construcción.	Yes	No	En general, mis profesores no se han referido a la posibilidad de utilizar adverbios en “-mente” en español o han mostrado una disposición neutral frente a este tipo de formas.	No sabría decir.	Sí.	En general, mis profesores me han aconsejado evitar el uso de construcciones pasivas en español o han mostrado una disposición desfavorable a este tipo de construcción.	No.	No.	La disposición de mis profesores con respecto al uso de construcciones con el verbo "poder" + infinitivo en español ha sido más bien heterogénea.	No sabría decir.	Sí.
65	La disposición de mis profesores con respecto al uso de gerundios en español ha sido más bien heterogénea.	No.	Sí.	La disposición de mis profesores con respecto al uso de adjetivos antepuestos al sustantivo en español ha sido más bien heterogénea.	No	Yes	En general, mis profesores me han aconsejado evitar el uso de adverbios en “-mente” o han mostrado una disposición desfavorable a este tipo de formas.	No.	Sí.	En general, mis profesores me han aconsejado evitar el uso de construcciones pasivas en español o han mostrado una disposición desfavorable a este tipo de construcción.	No sabría decir.	No.	La disposición de mis profesores con respecto al uso de construcciones con el verbo "poder" + infinitivo en español ha sido más bien heterogénea.	No sabría decir.	Sí.
66	En general, mis profesores me han aconsejado evitar el uso de gerundios en español o han mostrado una disposición desfavorable a este tipo de formas.	No.	No.	En general, mis profesores me han aconsejado evitar el uso de adjetivos antepuestos al sustantivo en español o han mostrado una disposición desfavorable a este tipo de construcción.	No	No	En general, mis profesores no se han referido a la posibilidad de utilizar adverbios en “-mente” en español o han mostrado una disposición neutral frente a este tipo de formas.	No.	Sí.	En general, mis profesores me han aconsejado evitar el uso de construcciones pasivas en español o han mostrado una disposición desfavorable a este tipo de construcción.	No.	No.	En general, mis profesores no se han referido a la posibilidad de utilizar construcciones con poder + infinitivo en español o han mostrado una disposición neutral a este tipo de construcciones.	No.	Sí.
67	En general, mis profesores me han aconsejado evitar el uso de gerundios en español o han mostrado una disposición desfavorable a este tipo de formas.	No.	No.	En general, mis profesores me han aconsejado evitar el uso de adjetivos antepuestos al sustantivo en español o han mostrado una disposición desfavorable a este tipo de construcción.	Yes	No	La disposición de mis profesores con respecto al uso de adverbios con la terminación "-mente" en español ha sido más bien heterogénea.	No.	Sí.	En general, mis profesores me han aconsejado evitar el uso de construcciones pasivas en español o han mostrado una disposición desfavorable a este tipo de construcción.	No.	No.	En general, mis profesores no se han referido a la posibilidad de utilizar construcciones con poder + infinitivo en español o han mostrado una disposición neutral a este tipo de construcciones.	Sí.	No.
68	En general, mis profesores me han aconsejado evitar el uso de gerundios en español o han mostrado una disposición desfavorable a este tipo de formas.	No.	Sí.	La disposición de mis profesores con respecto al uso de adjetivos antepuestos al sustantivo en español ha sido más bien heterogénea.	No	No	En general, mis profesores me han incentivado a utilizar adverbios en “-mente” o han mostrado una disposición favorable a este tipo de formas.	No.	Sí.	En general, mis profesores me han aconsejado evitar el uso de construcciones pasivas en español o han mostrado una disposición desfavorable a este tipo de construcción.	No sabría decir.	No.	En general, mis profesores no se han referido a la posibilidad de utilizar construcciones con poder + infinitivo en español o han mostrado una disposición neutral a este tipo de construcciones.	No.	Sí.
69	En general, mis profesores me han aconsejado evitar el uso de gerundios en español o han mostrado una disposición desfavorable a este tipo de formas.	No sabría decir.	Sí.	En general, mis profesores no se han referido a la posibilidad de utilizar adjetivos antepuestos al sustantivo en español o han mostrado una disposición neutral frente a este tipo de construcción.	No sabría decir.	Yes	La disposición de mis profesores con respecto al uso de adverbios con la terminación "-mente" en español ha sido más bien heterogénea.	No sabría decir.	Sí.	En general, mis profesores me han aconsejado evitar el uso de construcciones pasivas en español o han mostrado una disposición desfavorable a este tipo de construcción.	No sabría decir.	Sí.	En general, mis profesores no se han referido a la posibilidad de utilizar construcciones con poder + infinitivo en español o han mostrado una disposición neutral a este tipo de construcciones.	No sabría decir.	Sí.
70	En general, mis profesores me han aconsejado evitar el uso de gerundios en español o han mostrado una disposición desfavorable a este tipo de formas.	No.	No.	En general, mis profesores no se han referido a la posibilidad de utilizar adjetivos antepuestos al sustantivo en español o han mostrado una disposición neutral frente a este tipo de construcción.	Yes	Yes	En general, mis profesores no se han referido a la posibilidad de utilizar adverbios en “-mente” en español o han mostrado una disposición neutral frente a este tipo de formas.	No.	Sí.	La disposición de mis profesores con respecto al uso de construcciones pasivas en español ha sido más bien heterogénea.n 4	No.	Sí.	En general, mis profesores no se han referido a la posibilidad de utilizar construcciones con poder + infinitivo en español o han mostrado una disposición neutral a este tipo de construcciones.	No.	Sí.
71	En general, mis profesores me han aconsejado evitar el uso de gerundios en español o han mostrado una disposición desfavorable a este tipo de formas.	No.	No.	La disposición de mis profesores con respecto al uso de adjetivos antepuestos al sustantivo en español ha sido más bien heterogénea.	No	Yes	En general, mis profesores no se han referido a la posibilidad de utilizar adverbios en “-mente” en español o han mostrado una disposición neutral frente a este tipo de formas.	No.	Sí.	En general, mis profesores me han aconsejado evitar el uso de construcciones pasivas en español o han mostrado una disposición desfavorable a este tipo de construcción.	No sabría decir.	No.	La disposición de mis profesores con respecto al uso de construcciones con el verbo "poder" + infinitivo en español ha sido más bien heterogénea.	No.	Sí.
72	En general, mis profesores me han incentivado a utilizar gerundios en español o han mostrado una disposición favorable a este tipo de formas.	No.	No.	En general, mis profesores me han aconsejado evitar el uso de adjetivos antepuestos al sustantivo en español o han mostrado una disposición desfavorable a este tipo de construcción.	No	Yes	En general, mis profesores no se han referido a la posibilidad de utilizar adverbios en “-mente” en español o han mostrado una disposición neutral frente a este tipo de formas.	No.	Sí.	En general, mis profesores me han aconsejado evitar el uso de construcciones pasivas en español o han mostrado una disposición desfavorable a este tipo de construcción.	Sí.	No.	En general, mis profesores no se han referido a la posibilidad de utilizar construcciones con poder + infinitivo en español o han mostrado una disposición neutral a este tipo de construcciones.	No sabría decir.	Sí.
73	En general, mis profesores me han aconsejado evitar el uso de gerundios en español o han mostrado una disposición desfavorable a este tipo de formas.	No.	No.	La disposición de mis profesores con respecto al uso de adjetivos antepuestos al sustantivo en español ha sido más bien heterogénea.	No	No	La disposición de mis profesores con respecto al uso de adverbios con la terminación "-mente" en español ha sido más bien heterogénea.	No.	Sí.	En general, mis profesores me han aconsejado evitar el uso de construcciones pasivas en español o han mostrado una disposición desfavorable a este tipo de construcción.	Sí.	No.	En general, mis profesores no se han referido a la posibilidad de utilizar construcciones con poder + infinitivo en español o han mostrado una disposición neutral a este tipo de construcciones.	No sabría decir.	Sí.
74	La disposición de mis profesores con respecto al uso de gerundios en español ha sido más bien heterogénea.	No.	Sí.	La disposición de mis profesores con respecto al uso de adjetivos antepuestos al sustantivo en español ha sido más bien heterogénea.	No	Yes	La disposición de mis profesores con respecto al uso de adverbios con la terminación "-mente" en español ha sido más bien heterogénea.	No.	Sí.	La disposición de mis profesores con respecto al uso de construcciones pasivas en español ha sido más bien heterogénea.n 4	No.	Sí.	La disposición de mis profesores con respecto al uso de construcciones con el verbo "poder" + infinitivo en español ha sido más bien heterogénea.	No.	Sí.
75	La disposición de mis profesores con respecto al uso de gerundios en español ha sido más bien heterogénea.	No sabría decir.	No.	En general, mis profesores me han aconsejado evitar el uso de adjetivos antepuestos al sustantivo en español o han mostrado una disposición desfavorable a este tipo de construcción.	No sabría decir.	No	En general, mis profesores no se han referido a la posibilidad de utilizar adverbios en “-mente” en español o han mostrado una disposición neutral frente a este tipo de formas.	No sabría decir.	Sí.	En general, mis profesores me han aconsejado evitar el uso de construcciones pasivas en español o han mostrado una disposición desfavorable a este tipo de construcción.	No sabría decir.	No.	En general, mis profesores no se han referido a la posibilidad de utilizar construcciones con poder + infinitivo en español o han mostrado una disposición neutral a este tipo de construcciones.	No sabría decir.	Sí.
76	En general, mis profesores me han incentivado a utilizar gerundios en español o han mostrado una disposición favorable a este tipo de formas.	No.	Sí.	En general, mis profesores me han aconsejado evitar el uso de adjetivos antepuestos al sustantivo en español o han mostrado una disposición desfavorable a este tipo de construcción.	Yes	No	En general, mis profesores no se han referido a la posibilidad de utilizar adverbios en “-mente” en español o han mostrado una disposición neutral frente a este tipo de formas.	No.	Sí.	En general, mis profesores me han aconsejado evitar el uso de construcciones pasivas en español o han mostrado una disposición desfavorable a este tipo de construcción.	Sí.	No.	En general, mis profesores no se han referido a la posibilidad de utilizar construcciones con poder + infinitivo en español o han mostrado una disposición neutral a este tipo de construcciones.	No sabría decir.	Sí.
77	En general, mis profesores me han aconsejado evitar el uso de gerundios en español o han mostrado una disposición desfavorable a este tipo de formas.	No.	Sí.	La disposición de mis profesores con respecto al uso de adjetivos antepuestos al sustantivo en español ha sido más bien heterogénea.	No	Yes	La disposición de mis profesores con respecto al uso de adverbios con la terminación "-mente" en español ha sido más bien heterogénea.	No.	Sí.	En general, mis profesores me han aconsejado evitar el uso de construcciones pasivas en español o han mostrado una disposición desfavorable a este tipo de construcción.	No.	No.	La disposición de mis profesores con respecto al uso de construcciones con el verbo "poder" + infinitivo en español ha sido más bien heterogénea.	No.	Sí.
78	En general, mis profesores no se han referido a la posibilidad de utilizar gerundios en español o han mostrado una disposición neutral a este tipo de formas.	Sí.	No.	En general, mis profesores me han aconsejado evitar el uso de adjetivos antepuestos al sustantivo en español o han mostrado una disposición desfavorable a este tipo de construcción.	Yes	No	En general, mis profesores no se han referido a la posibilidad de utilizar adverbios en “-mente” en español o han mostrado una disposición neutral frente a este tipo de formas.	No sabría decir.	Sí.	En general, mis profesores me han incentivado a utilizar construcciones pasivas en español o han mostrado una disposición favorable a este tipo de construcción.	Sí.	Sí.	En general, mis profesores me han incentivado a utilizar construcciones con poder + infinitivo en español o han mostrado una disposición favorable a este tipo de construcciones.	Sí.	Sí.
79	En general, mis profesores me han aconsejado evitar el uso de gerundios en español o han mostrado una disposición desfavorable a este tipo de formas.	No.	Sí.	En general, mis profesores me han aconsejado evitar el uso de adjetivos antepuestos al sustantivo en español o han mostrado una disposición desfavorable a este tipo de construcción.	No sabría decir.	Yes	En general, mis profesores me han aconsejado evitar el uso de adverbios en “-mente” o han mostrado una disposición desfavorable a este tipo de formas.	No.	Sí.	En general, mis profesores me han aconsejado evitar el uso de construcciones pasivas en español o han mostrado una disposición desfavorable a este tipo de construcción.	Sí.	No.	En general, mis profesores no se han referido a la posibilidad de utilizar construcciones con poder + infinitivo en español o han mostrado una disposición neutral a este tipo de construcciones.	No sabría decir.	Sí.
80	En general, mis profesores me han aconsejado evitar el uso de gerundios en español o han mostrado una disposición desfavorable a este tipo de formas.	No sabría decir.	Sí.	En general, mis profesores no se han referido a la posibilidad de utilizar adjetivos antepuestos al sustantivo en español o han mostrado una disposición neutral frente a este tipo de construcción.	No sabría decir.	Yes	En general, mis profesores me han aconsejado evitar el uso de adverbios en “-mente” o han mostrado una disposición desfavorable a este tipo de formas.	No.	Sí.	En general, mis profesores me han aconsejado evitar el uso de construcciones pasivas en español o han mostrado una disposición desfavorable a este tipo de construcción.	No.	No.	En general, mis profesores no se han referido a la posibilidad de utilizar construcciones con poder + infinitivo en español o han mostrado una disposición neutral a este tipo de construcciones.	No.	Sí.
81	En general, mis profesores me han aconsejado evitar el uso de gerundios en español o han mostrado una disposición desfavorable a este tipo de formas.	Sí.	No.	En general, mis profesores me han aconsejado evitar el uso de adjetivos antepuestos al sustantivo en español o han mostrado una disposición desfavorable a este tipo de construcción.	Yes	No	En general, mis profesores me han aconsejado evitar el uso de adverbios en “-mente” o han mostrado una disposición desfavorable a este tipo de formas.	Sí.	No.	En general, mis profesores me han aconsejado evitar el uso de construcciones pasivas en español o han mostrado una disposición desfavorable a este tipo de construcción.	Sí.	No.	En general, mis profesores no se han referido a la posibilidad de utilizar construcciones con poder + infinitivo en español o han mostrado una disposición neutral a este tipo de construcciones.	No sabría decir.	Sí.
82	En general, mis profesores me han aconsejado evitar el uso de gerundios en español o han mostrado una disposición desfavorable a este tipo de formas.	No sabría decir.	No.	La disposición de mis profesores con respecto al uso de adjetivos antepuestos al sustantivo en español ha sido más bien heterogénea.	Yes	No	En general, mis profesores me han aconsejado evitar el uso de adverbios en “-mente” o han mostrado una disposición desfavorable a este tipo de formas.	Sí.	No.	La disposición de mis profesores con respecto al uso de construcciones pasivas en español ha sido más bien heterogénea.n 4	No.	Sí.	En general, mis profesores me han incentivado a utilizar construcciones con poder + infinitivo en español o han mostrado una disposición favorable a este tipo de construcciones.	Sí.	No.
83	La disposición de mis profesores con respecto al uso de gerundios en español ha sido más bien heterogénea.	No.	No.	En general, mis profesores no se han referido a la posibilidad de utilizar adjetivos antepuestos al sustantivo en español o han mostrado una disposición neutral frente a este tipo de construcción.	No	Yes	En general, mis profesores no se han referido a la posibilidad de utilizar adverbios en “-mente” en español o han mostrado una disposición neutral frente a este tipo de formas.	No.	Sí.	En general, mis profesores no se han referido a la posibilidad de utilizar construcciones pasivas en español o han mostrado una disposición neutral frente a este tipo de construcción.	No.	Sí.	En general, mis profesores no se han referido a la posibilidad de utilizar construcciones con poder + infinitivo en español o han mostrado una disposición neutral a este tipo de construcciones.	No.	Sí.
84	La disposición de mis profesores con respecto al uso de gerundios en español ha sido más bien heterogénea.	No.	Sí.	En general, mis profesores me han aconsejado evitar el uso de adjetivos antepuestos al sustantivo en español o han mostrado una disposición desfavorable a este tipo de construcción.	No	Yes	En general, mis profesores me han incentivado a utilizar adverbios en “-mente” o han mostrado una disposición favorable a este tipo de formas.	No.	Sí.	En general, mis profesores me han aconsejado evitar el uso de construcciones pasivas en español o han mostrado una disposición desfavorable a este tipo de construcción.	No.	No.	En general, mis profesores no se han referido a la posibilidad de utilizar construcciones con poder + infinitivo en español o han mostrado una disposición neutral a este tipo de construcciones.	No.	Sí.
85	En general, mis profesores me han aconsejado evitar el uso de gerundios en español o han mostrado una disposición desfavorable a este tipo de formas.	No.	Sí.	En general, mis profesores me han aconsejado evitar el uso de adjetivos antepuestos al sustantivo en español o han mostrado una disposición desfavorable a este tipo de construcción.	No	Yes	En general, mis profesores no se han referido a la posibilidad de utilizar adverbios en “-mente” en español o han mostrado una disposición neutral frente a este tipo de formas.	No.	Sí.	En general, mis profesores me han aconsejado evitar el uso de construcciones pasivas en español o han mostrado una disposición desfavorable a este tipo de construcción.	No.	Sí.	En general, mis profesores no se han referido a la posibilidad de utilizar construcciones con poder + infinitivo en español o han mostrado una disposición neutral a este tipo de construcciones.	Sí.	No.
86	En general, mis profesores me han aconsejado evitar el uso de gerundios en español o han mostrado una disposición desfavorable a este tipo de formas.	No sabría decir.	No.	En general, mis profesores me han aconsejado evitar el uso de adjetivos antepuestos al sustantivo en español o han mostrado una disposición desfavorable a este tipo de construcción.	Yes	No	En general, mis profesores me han incentivado a utilizar adverbios en “-mente” o han mostrado una disposición favorable a este tipo de formas.	No sabría decir.	Sí.	En general, mis profesores me han aconsejado evitar el uso de construcciones pasivas en español o han mostrado una disposición desfavorable a este tipo de construcción.	Sí.	No.	La disposición de mis profesores con respecto al uso de construcciones con el verbo "poder" + infinitivo en español ha sido más bien heterogénea.	No sabría decir.	Sí.

## Sheet: Instructor responses
Raw data (Spanish) - From hispanisms to anglicisms / Carlos I. Echeverría and César A. González Fernández																Raw data - From hispanisms to anglicisms / Carlos I. Echeverría and César A. González Fernández																Raw data - From hispanisms to anglicisms / Carlos I. Echeverría and César A. González Fernández																Raw data - From hispanisms to anglicisms / Carlos I. Echeverría and César A. González Fernández
Participante	Respecto del uso de gerundios, entendidos estos como las formas verbales impersonales que en español terminan en “-ndo” (p. ej., “jugando”, “bailando”), ¿cuál de las siguientes alternativas refleja su conducta como docente de traducción?	Definiéndose como anglicismo cualquier uso lingüístico proveniente del inglés o que imite los usos propios de dicha lengua, ¿estaría de acuerdo en calificar los gerundios como anglicismos?	Personalmente, ¿considera aceptable, en general, usar gerundios al escribir en español y al traducir del inglés al español?	Respecto del uso de adjetivos antepuestos al sustantivo (p. ej., “hermoso día”, “altos edificios”), ¿cuál de las siguientes alternativas refleja su conducta como docente de traducción?	Definiéndose como anglicismo cualquier uso lingüístico proveniente del inglés o que imite los usos propios de dicha lengua, ¿estarías de acuerdo en calificar los adjetivos antepuestos al sustantivo como anglicismos?	Personalmente, ¿considera aceptable, en general, usar adjetivos antepuestos al sustantivo al escribir en español y al traducir del inglés al español?	Respecto del uso de adverbios con la terminación “-mente” (p. ej., “rápidamente”, “efectivamente”), ¿cuál de las siguientes alternativas refleja su conducta como docente de traducción?	Definiéndose como anglicismo cualquier uso lingüístico proveniente del inglés o que imite los usos propios de dicha lengua, ¿estaría de acuerdo en calificar los adverbios en “-mente” como anglicismos?	Personalmente, ¿considera aceptable, en general, usar adverbios en “-mente” al escribir en español y al traducir del inglés al español?	Definiéndose como construcción pasiva cualquier oración con el verbo “ser” + participio en que el sujeto gramatical adquiera el rol de paciente (p. ej., “La iglesia fue construida a comienzos del siglo XVIII”, “Pedro fue regañado por su madre”), ¿cuál de las siguientes alternativas refleja su conducta como docente de traducción?	Definiéndose como anglicismo cualquier uso lingüístico proveniente del inglés o que imite los usos propios de dicha lengua, ¿estaría de acuerdo en calificar las construcciones pasivas como anglicismos?	Personalmente, ¿considera aceptable, en general, usar construcciones pasivas al escribir en español y al traducir del inglés al español?	Respecto del uso de construcciones con el verbo “poder” + infinitivo (p. ej., “Al fin podré comer”, “Para poder participar hay que estar inscrito”), ¿cuál de las siguientes alternativas refleja su conducta como docente de traducción?	Definiéndose como anglicismo cualquier uso lingüístico proveniente del inglés o que imite los usos propios de dicha lengua, ¿estaría de acuerdo en calificar las construcciones con “poder” + infinitivo como anglicismos?	Personalmente, ¿considera aceptable, en general, usar construcciones con “poder” + infinitivo al escribir en español y al traducir del inglés al español?
1	En general, incentivo a mis estudiantes a utilizar gerundios en español o muestro una disposición favorable a este tipo de formas.	No.	Sí.	En general, mi disposición frente a los adjetivos antepuestos al sustantivo en español es neutral.	No.	Sí.	En general, mi disposición frente a los adverbios en “-mente” es neutral.	No.	Sí.	En general, incentivo a mis estudiantes a utilizar construcciones pasivas en español o muestro una disposición favorable a este tipo de construcción.	No.	Sí.	En general, mi disposición frente a las construcciones con “poder” + infinitivo en español es neutral.	No.	Sí
2	En general, incentivo a mis estudiantes a utilizar gerundios en español o muestro una disposición favorable a este tipo de formas.	No.	Sí.	En general, incentivo a mis estudiantes a utilizar adjetivos antepuestos al sustantivo en español o muestro una disposición favorable a este tipo de construcción.	No.	Sí.	En general, incentivo a mis estudiantes a utilizar adverbios en “¬-mente” o muestro una disposición favorable a este tipo de formas.	No.	Sí.	En general, incentivo a mis estudiantes a utilizar construcciones pasivas en español o muestro una disposición favorable a este tipo de construcción.	No.	Sí.	En general, incentivo a mis estudiantes a utilizar construcciones con “poder” + infinitivo en español o muestro una disposición favorable a este tipo de construcciones.	No.	Sí
3	En general, aconsejo a mis estudiantes evitar el uso de gerundios en español o muestro una disposición desfavorable a este tipo de formas.	No.	Sí.	En general, mi disposición frente a los adjetivos antepuestos al sustantivo en español es neutral.	No.	Sí.	En general, mi disposición frente a los adverbios en “-mente” es neutral.	No.	Sí.	En general, aconsejo a mis estudiantes evitar el uso de construcciones pasivas en español o muestro una disposición desfavorable a este tipo de construcción.	No.	Sí.	En general, mi disposición frente a las construcciones con “poder” + infinitivo en español es neutral.	No.	Sí
4	En general, aconsejo a mis estudiantes evitar el uso de gerundios en español o muestro una disposición desfavorable a este tipo de formas.	Sí.	Sí.	En general, incentivo a mis estudiantes a utilizar adjetivos antepuestos al sustantivo en español o muestro una disposición favorable a este tipo de construcción.	No.	Sí.	En general, aconsejo a mis estudiantes evitar el uso de adverbios en ¬“-mente” o muestro una disposición desfavorable a este tipo de formas.	Sí.	Sí.	En general, aconsejo a mis estudiantes evitar el uso de construcciones pasivas en español o muestro una disposición desfavorable a este tipo de construcción.	Sí.	No.	En general, mi disposición frente a las construcciones con “poder” + infinitivo en español es neutral.	No.	Sí
5	En general, mi disposición frente al gerundio español es neutral.	No.	Sí.	En general, aconsejo a mis estudiantes evitar el uso de adjetivos antepuestos al sustantivo en español o muestro una disposición desfavorable a este tipo de construcción.	No.	No.	En general, mi disposición frente a los adverbios en “-mente” es neutral.	No.	Sí.	En general, aconsejo a mis estudiantes evitar el uso de construcciones pasivas en español o muestro una disposición desfavorable a este tipo de construcción.	No.	No.	En general, incentivo a mis estudiantes a utilizar construcciones con “poder” + infinitivo en español o muestro una disposición favorable a este tipo de construcciones.	No.	Sí
6	En general, aconsejo a mis estudiantes evitar el uso de gerundios en español o muestro una disposición desfavorable a este tipo de formas.	No.	Sí.	En general, mi disposición frente a los adjetivos antepuestos al sustantivo en español es neutral.	No.	Sí.	En general, mi disposición frente a los adverbios en “-mente” es neutral.	No.	Sí.	En general, aconsejo a mis estudiantes evitar el uso de construcciones pasivas en español o muestro una disposición desfavorable a este tipo de construcción.	Sí.	Sí.	En general, mi disposición frente a las construcciones con “poder” + infinitivo en español es neutral.	No.	Sí
7	En general, mi disposición frente al gerundio español es neutral.	No.	Sí.	En general, mi disposición frente a los adjetivos antepuestos al sustantivo en español es neutral.	No.	Sí.	En general, mi disposición frente a los adverbios en “-mente” es neutral.	No.	Sí.	En general, mi disposición frente a las construcciones pasivas en español es neutral.	No.	Sí.	En general, mi disposición frente a las construcciones con “poder” + infinitivo en español es neutral.	No.	Sí
8	En general, incentivo a mis estudiantes a utilizar gerundios en español o muestro una disposición favorable a este tipo de formas.	No sabría decir.	Sí.	En general, mi disposición frente a los adjetivos antepuestos al sustantivo en español es neutral.	No.	No.	En general, mi disposición frente a los adverbios en “-mente” es neutral.	No sabría decir.	Sí.	En general, mi disposición frente a las construcciones pasivas en español es neutral.	Sí.	Sí.	En general, mi disposición frente a las construcciones con “poder” + infinitivo en español es neutral.	No sabría decir.	No
9	En general, mi disposición frente al gerundio español es neutral.	No.	Sí.	En general, mi disposición frente a los adjetivos antepuestos al sustantivo en español es neutral.	Sí.	Sí.	En general, mi disposición frente a los adverbios en “-mente” es neutral.	No.	Sí.	En general, mi disposición frente a las construcciones pasivas en español es neutral.	Sí.	Sí.	En general, mi disposición frente a las construcciones con “poder” + infinitivo en español es neutral.	No.	Sí
10	En general, aconsejo a mis estudiantes evitar el uso de gerundios en español o muestro una disposición desfavorable a este tipo de formas.	Sí.	No.	En general, mi disposición frente a los adjetivos antepuestos al sustantivo en español es neutral.	No sabría decir.	No.	En general, aconsejo a mis estudiantes evitar el uso de adverbios en ¬“-mente” o muestro una disposición desfavorable a este tipo de formas.	Sí.	No.	En general, aconsejo a mis estudiantes evitar el uso de construcciones pasivas en español o muestro una disposición desfavorable a este tipo de construcción.	Sí.	No.	En general, aconsejo a mis estudiantes evitar el uso de construcciones con “poder” + infinitivo en español o muestro una disposición desfavorable a este tipo de construcciones.	Sí.	No
11	En general, mi disposición frente al gerundio español es neutral.	Sí.	No.	En general, aconsejo a mis estudiantes evitar el uso de adjetivos antepuestos al sustantivo en español o muestro una disposición desfavorable a este tipo de construcción.	Sí.	No.	En general, mi disposición frente a los adverbios en “-mente” es neutral.	Sí.	No.	En general, mi disposición frente a las construcciones pasivas en español es neutral.	No.	Sí.	En general, mi disposición frente a las construcciones con “poder” + infinitivo en español es neutral.	No.	No
12	En general, aconsejo a mis estudiantes evitar el uso de gerundios en español o muestro una disposición desfavorable a este tipo de formas.	No.	No.	En general, aconsejo a mis estudiantes evitar el uso de adjetivos antepuestos al sustantivo en español o muestro una disposición desfavorable a este tipo de construcción.	Sí.	No.	En general, mi disposición frente a los adverbios en “-mente” es neutral.	No.	Sí.	En general, aconsejo a mis estudiantes evitar el uso de construcciones pasivas en español o muestro una disposición desfavorable a este tipo de construcción.	Sí.	No.	En general, mi disposición frente a las construcciones con “poder” + infinitivo en español es neutral.	No.	Sí
13	En general, aconsejo a mis estudiantes evitar el uso de gerundios en español o muestro una disposición desfavorable a este tipo de formas.	Sí.	No.	En general, mi disposición frente a los adjetivos antepuestos al sustantivo en español es neutral.	No.	Sí.	En general, mi disposición frente a los adverbios en “-mente” es neutral.	No.	Sí.	En general, aconsejo a mis estudiantes evitar el uso de construcciones pasivas en español o muestro una disposición desfavorable a este tipo de construcción.	Sí.	No.	En general, mi disposición frente a las construcciones con “poder” + infinitivo en español es neutral.	No.	Sí
14	En general, aconsejo a mis estudiantes evitar el uso de gerundios en español o muestro una disposición desfavorable a este tipo de formas.	Sí.	Sí.	En general, mi disposición frente a los adjetivos antepuestos al sustantivo en español es neutral.	No.	Sí.	En general, mi disposición frente a los adverbios en “-mente” es neutral.	No.	Sí.	En general, aconsejo a mis estudiantes evitar el uso de construcciones pasivas en español o muestro una disposición desfavorable a este tipo de construcción.	No.	No.	En general, mi disposición frente a las construcciones con “poder” + infinitivo en español es neutral.	No.	Sí
15	En general, aconsejo a mis estudiantes evitar el uso de gerundios en español o muestro una disposición desfavorable a este tipo de formas.	No.	No.	En general, mi disposición frente a los adjetivos antepuestos al sustantivo en español es neutral.	No.	No.	En general, aconsejo a mis estudiantes evitar el uso de adverbios en ¬“-mente” o muestro una disposición desfavorable a este tipo de formas.	No sabría decir.	No.	En general, aconsejo a mis estudiantes evitar el uso de construcciones pasivas en español o muestro una disposición desfavorable a este tipo de construcción.	Sí.	No.	En general, aconsejo a mis estudiantes evitar el uso de construcciones con “poder” + infinitivo en español o muestro una disposición desfavorable a este tipo de construcciones.	Sí.	No
16	En general, incentivo a mis estudiantes a utilizar gerundios en español o muestro una disposición favorable a este tipo de formas.	No.	Sí.	En general, mi disposición frente a los adjetivos antepuestos al sustantivo en español es neutral.	No.	Sí.	En general, mi disposición frente a los adverbios en “-mente” es neutral.	No.	Sí.	En general, mi disposición frente a las construcciones pasivas en español es neutral.	No.	Sí.	En general, mi disposición frente a las construcciones con “poder” + infinitivo en español es neutral.	No.	Sí
17	En general, incentivo a mis estudiantes a utilizar gerundios en español o muestro una disposición favorable a este tipo de formas.	No.	Sí.	En general, incentivo a mis estudiantes a utilizar adjetivos antepuestos al sustantivo en español o muestro una disposición favorable a este tipo de construcción.	No.	Sí.	En general, mi disposición frente a los adverbios en “-mente” es neutral.	No.	Sí.	En general, mi disposición frente a las construcciones pasivas en español es neutral.	No.	Sí.	En general, aconsejo a mis estudiantes evitar el uso de construcciones con “poder” + infinitivo en español o muestro una disposición desfavorable a este tipo de construcciones.	No.	Sí
